# Supplementary material for: The Arabidopsis Mediator CDK8 module genes CCT (MED12) and GCT (MED13) are global regulators of developmental phase transitions
Source: Oxford University Press journal article supplement (doi:10.1242/dev.111229), 2014-11-07
Supplement: dev111229supp.pdf [file dev111229supp.pdf]

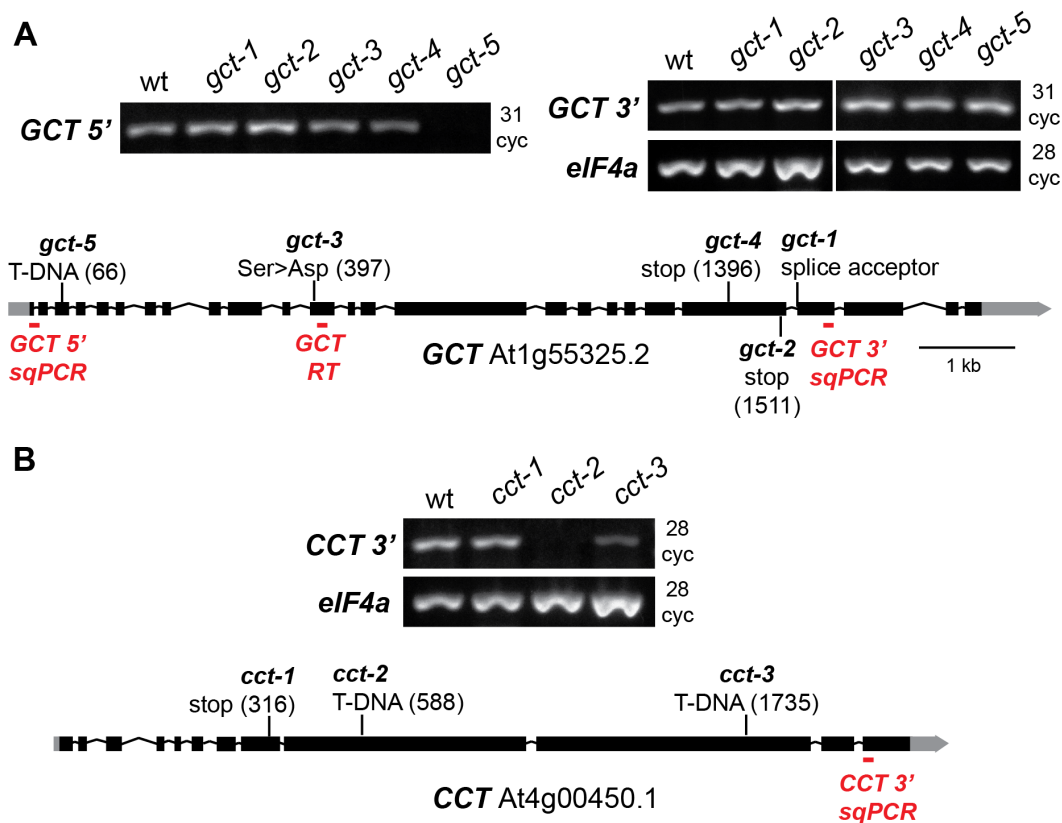

**Figure S1. Semi-quantitative RT-PCR analysis of *GCT* and *CCT* transcripts in all *gct* and *cct* alleles, and location of all *gct* and *cct* mutations.**

**(A) Above left,** Semi-quantitative RT-PCR analysis of all *gct* alleles detected no *GCT* transcript in *gct-5*, as previously demonstrated by Ito et al. (2011). A primer pair at the 5' end of the transcript (*GCT* 5' sqPCR, shown in red below) was used to amplify from cDNA generated with a *GCT*-specific RT primer (*GCT* RT, shown in red below). The *GCT*-specific primer was used for RT because the 5' *GCT* primer pair did not amplify transcript from any wt or *gct* allele using cDNA transcribed with oligo dT, probably due to the 6 kb length of the *GCT* transcript (data not shown). Since the cDNA pool was specific to *GCT*, an eIF4a positive control could not be performed. **Above right,** semi-quantitative RT-PCR analysis of all *gct* alleles using a primer pair in the 3' region of the *GCT* transcript (*GCT* 3' sqPCR, shown in red below), as well as a primer pair for eIF4a as a control, to amplify from oligo dT cDNA pools. The 5' and 3' *GCT* primer pairs amplify both At1g55325.1 and At1g55325.2 splice variants. **Below,** gene model for *GCT* transcript At1g55325.2. The codon location for all *gct* mutations from Gillmor et al. (2010) are indicated in parentheses, with the exception of *gct-1*, which consists of a G>A change 14bp upstream of the splice acceptor for exon 22, creating an early splice acceptor that results in a downstream frameshift. *gct-5* corresponds to the T-DNA allele SAIL\_1169\_H11, and also to *mab2-2* (Ito et al., 2011). All other *gct* alleles were generated by EMS mutagenesis (Gillmor et al., 2010).

**(B) Above,** Semi-quantitative RT-PCR analysis detected no *CCT* transcript in *cct-2*, as previously demonstrated by Imura et al. (2012), and greatly reduced transcript levels in *cct-3*. A primer pair in the 3' region of the *CCT* transcript (*CCT* 3' sqPCR shown in red below) was used to amplify from oligo dT-primed cDNA pools. **Below,** gene model for *CCT* transcript At1g00450.1. The locations of mutations or insertions in all *cct* alleles reported in Gillmor et al. (2010) are shown. The codon locations differ significantly from those in the computationally predicted *CCT* gene model used as a reference in Gillmor et al. (2010). The gene model shown here is based on a cloned *CCT/CRP* cDNA, published by Imura et al. (2012). Importantly, the experimentally determined cDNA sequence demonstrates that the *cct-1* allele causes a translational stop at codon 316, not a Gly>Asp change as predicted by the non-experimentally verified *CCT* transcript model used in Gillmor et al. (2010). *cct-2* corresponds to T-DNA allele SALK\_108241, and also to *crp-3* (Imura et al., 2012), while *cct-3* corresponds to T-DNA allele SALK\_124276, and also to *crp-4* (Imura et al., 2012).

*GCT* and *CCT* gene models were drawn based on annotations at [www.arabidopsis.org](http://www.arabidopsis.org). For all RT-PCR experiments, representative results for one of three biological replicates are shown. RNA was extracted from pools of at least 5 four-week-old plants.

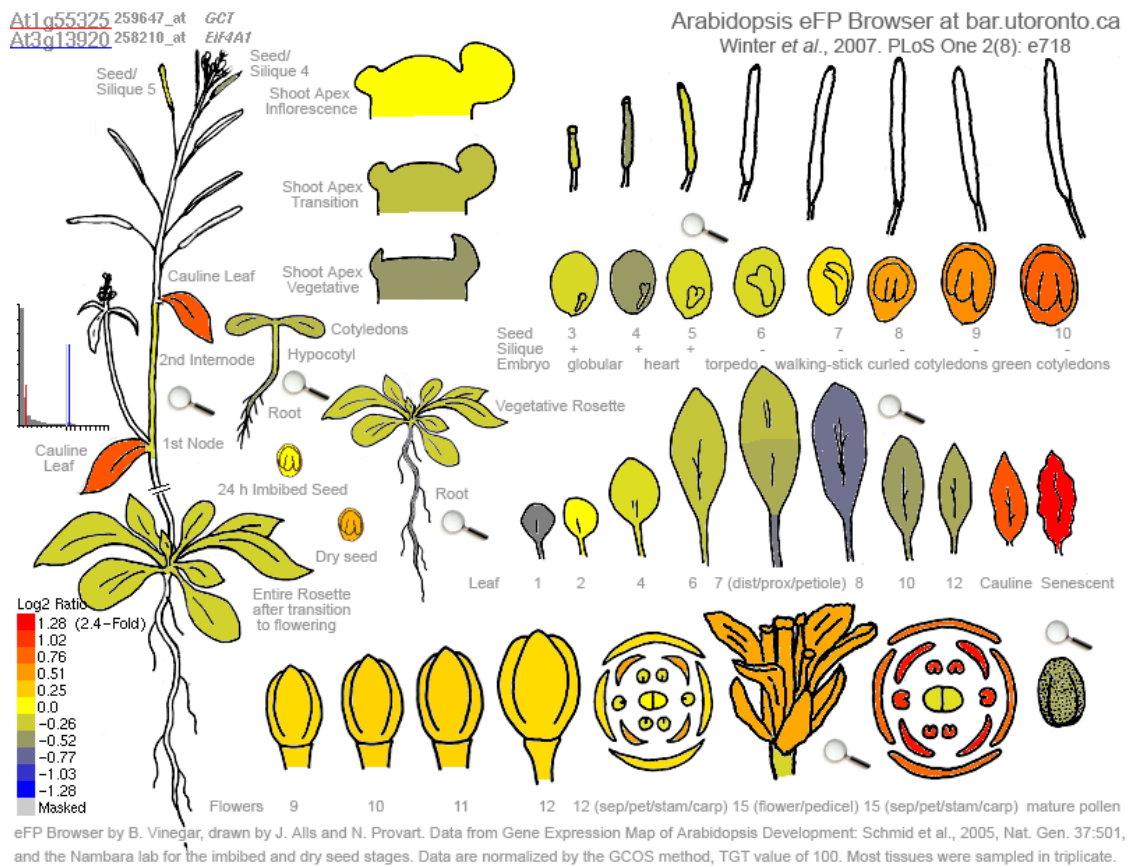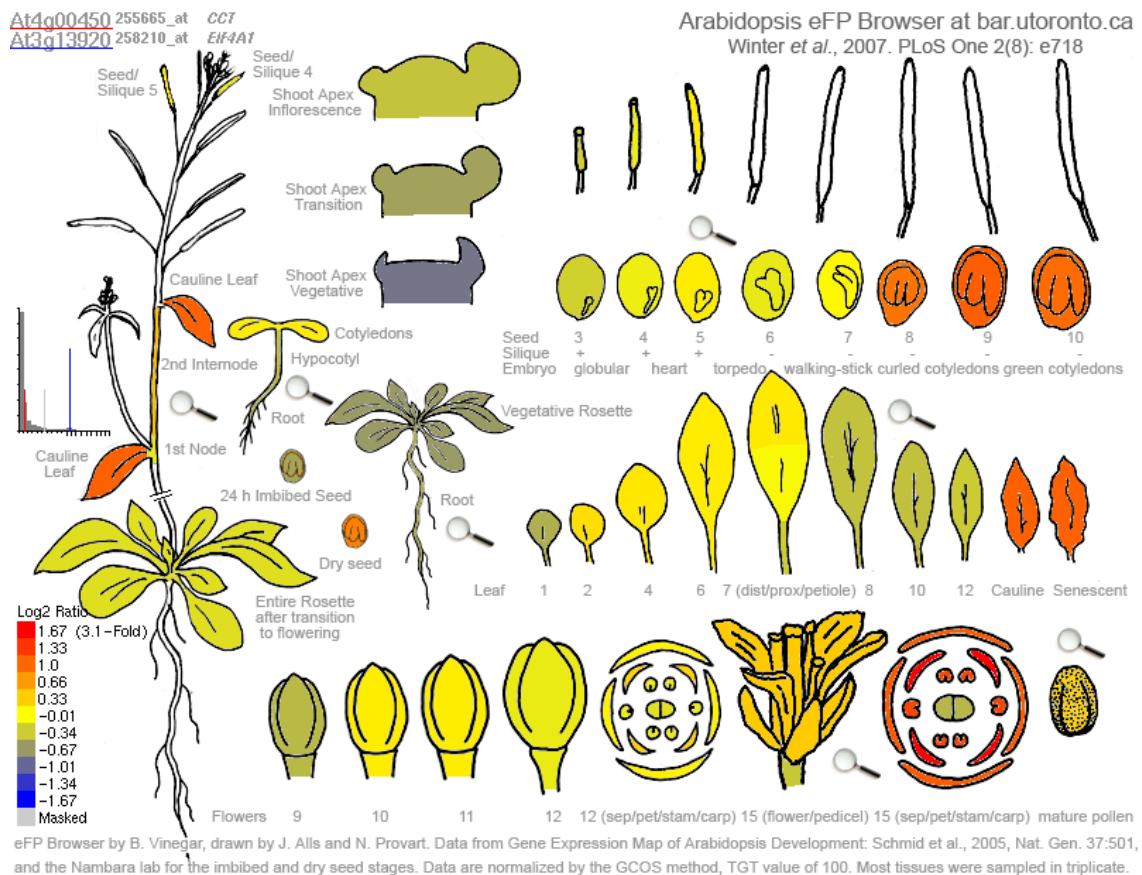

**Figure S2.** Expression of *GCT* (top) and *CCT* (bottom) relative to *EIF4A*, throughout development. Analysis done with the BAR eFP expression browser (<http://bar.utoronto.ca/efp/cgi-bin/efpWeb.cgi>).

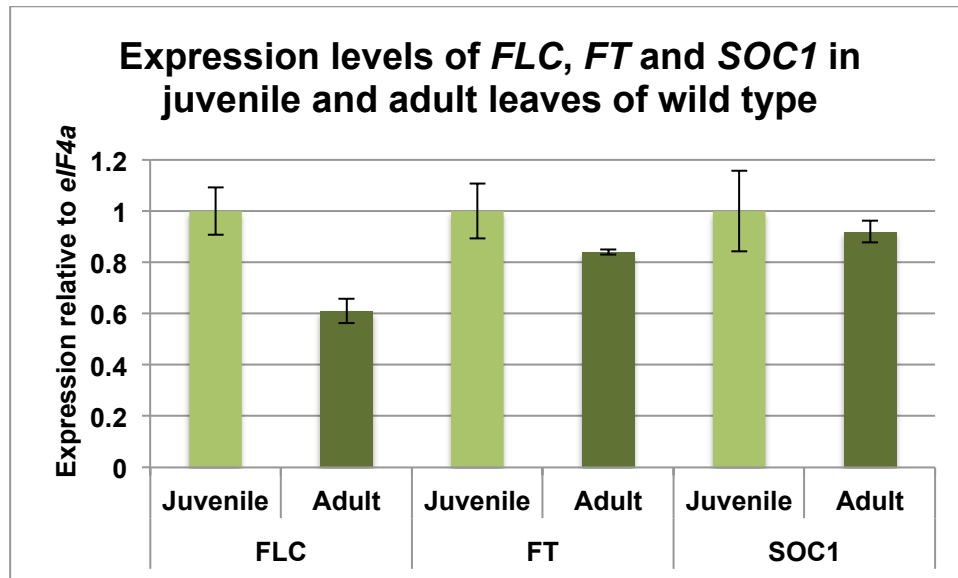

**Figure S3. Expression of *FLC*, *FT* and *SOC1* in juvenile and adult leaves of wild type.**

Quantitative RT-PCR analysis of *FLC*, *FT*, and *SOC1* expression in juvenile and adult leaves of 20d old plants grown in long day conditions (see Methods). RNA was extracted from pools of the first three leaves (Juvenile) or the fifth to seventh leaves (Adult) of at least four plants for each biological replicate. Data are the average of three biological replicates, with three technical replicates for each biological replicate. Standard deviation for each average is shown with bars. *eIF4a* was used as a control for expression levels.

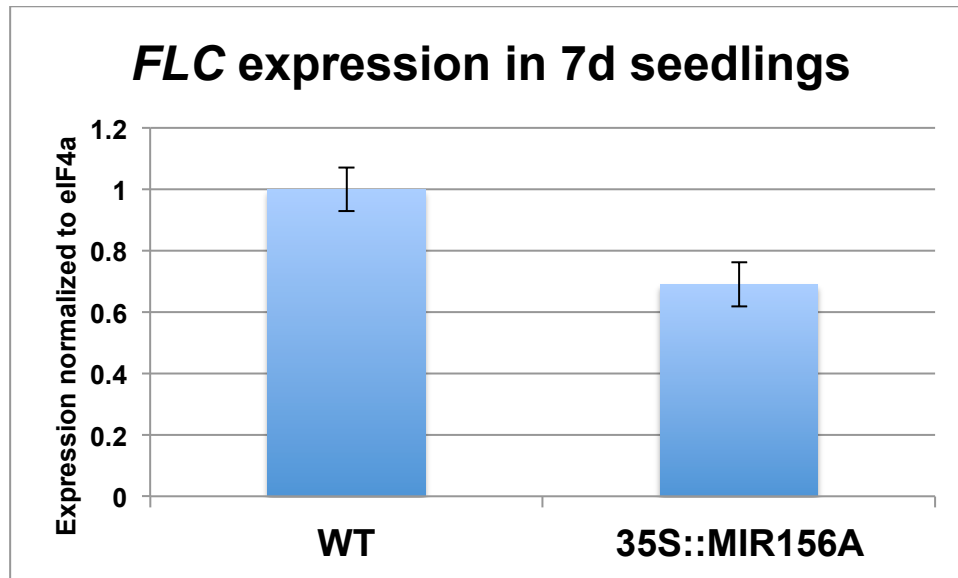

**Figure S4. Overexpression of miR156 causes a decrease in *FLC* levels.**

Quantitative RT-PCR analysis of *FLC* expression in 7d wild type and 35S::MIR156A seedlings. Seedlings were grown in long day conditions (see Methods). The 35S::MIR156A transgenic line is described in Wu and Poethig (2006). Data are the average of three biological replicates, with three technical replicates for each biological replicate. Standard deviation is shown.

| Table S1. Sequences of oligonucleotides used in this study |                          |                                                      |                                                                                                                                                                                |
|------------------------------------------------------------|--------------------------|------------------------------------------------------|--------------------------------------------------------------------------------------------------------------------------------------------------------------------------------|
| Name                                                       | Sequence (5' to 3')      | Purpose                                              | Notes                                                                                                                                                                          |
| <i>gct-2F</i>                                              | actggagatggcttgaagcatccg | genotype <i>gct-2</i> allele                         | amplification produces a 200bp product; the wt Col allele is cut at bp 175 by HpaII; the <i>gct-2</i> allele does not cut. 50°C annealing temperature; 3mM MgCl <sub>2</sub> . |
| <i>gct-2R</i>                                              | tcgaagaaattccaatgcg      |                                                      |                                                                                                                                                                                |
| <i>cct-1F</i>                                              | agtccagcatcaacaagcc      | genotype <i>cct-1</i> allele                         | amplification produces a 125bp product; <i>cct-1</i> allele is cut at bp 105 by EcoRV; wt Col allele does not cut. 50°C annealing temperature; 3mM MgCl <sub>2</sub> .         |
| <i>cct-1R</i>                                              | actgtagaagacgcaccagata   |                                                      |                                                                                                                                                                                |
| <i>flc-3F</i>                                              | gctcgtcatgcggtacacgtg    | genotype <i>flc-3</i> allele                         | Amplify a 460bp fragment from wt Col, and a 356 bp fragment from <i>flc-3</i> .                                                                                                |
| <i>flc-3R</i>                                              | ggcgtacttatgccggagg      |                                                      |                                                                                                                                                                                |
| <i>GCT 5' sqPCR F</i>                                      | AATTCCGAGCGCTTCAAGAC     | detect transcript in <i>gct</i> alleles at 5' region |                                                                                                                                                                                |
| <i>GCT 5' sqPCR R</i>                                      | TGTAGACCACCAATTCTGAAAAC  |                                                      |                                                                                                                                                                                |
| <i>GCT 3' sqPCR F</i>                                      | GGTACTCCAAGGGGATTGTTTCAG | detect transcript in <i>gct</i> alleles at 3' region |                                                                                                                                                                                |
| <i>GCT 3' sqPCR R</i>                                      | ACCAGCGGATACCAACTCA      |                                                      |                                                                                                                                                                                |
| <i>GCT RT</i>                                              | GCATCAGCGTCAAGATCACCAGTT | Reverse transcription with GCT-specific primer       |                                                                                                                                                                                |
| <i>CCT 3' sqPCR F</i>                                      | GAGCTTACAGAATGAGCTTTCGC  | detect transcript in <i>cct</i> alleles at 3' region |                                                                                                                                                                                |
| <i>CCT 3' sqPCR R</i>                                      | GAACAGAATGAGGCTGGCATGAGA |                                                      |                                                                                                                                                                                |
| <i>miR156</i>                                              | GTGCTCACTCTTCTGTCA       | miRNA Northern blot                                  |                                                                                                                                                                                |
| <i>miR172</i>                                              | ATGCAGCATCATCAAGATTCT    | miRNA Northern blot                                  |                                                                                                                                                                                |
| <i>miR159</i>                                              | TAGAGCTCCCTTCAATCCAAA    | miRNA Northern blot                                  |                                                                                                                                                                                |
| <i>miR161</i>                                              | ACCCCGATGTAGTCACTTTCA    | miRNA Northern blot                                  |                                                                                                                                                                                |
| <i>miR168</i>                                              | TTCCCGACCTGCACCAAGCGA    | miRNA Northern blot                                  |                                                                                                                                                                                |
| <i>U6</i>                                                  | AGGGGCCATGCTAATCTTCTC    | <i>U6</i> miRNA Northern blot                        |                                                                                                                                                                                |

|                |                                |         |  |
|----------------|--------------------------------|---------|--|
| <i>SPL3-F</i>  | CTTAGCTGGACACAACGAGAGAAGG<br>C | qRT-PCR |  |
| <i>SPL3-R</i>  | GAGAAACAGACAGAGACACAGAGGA      | qRT-PCR |  |
| <i>SPL9-F</i>  | CAAGGTTCAAGTTGGTGGAGGA         | qRT-PCR |  |
| <i>SPL9-R</i>  | TGAAGAAGCTCGCCATGTATTG         | qRT-PCR |  |
| <i>FLC-F</i>   | GCCAAGAAGACCGAACTCATGTTGA      | qRT-PCR |  |
| <i>FLC-R</i>   | TCCAGCAGGTGACATCTCCATCTC       | qRT-PCR |  |
| <i>FT-F</i>    | TGGTGGATCCAGATGTTCCAAGTC       | qRT-PCR |  |
| <i>FT-R</i>    | CTCATTGCCAAAGGTTGTTCCAGTT      | qRT-PCR |  |
| <i>SOC1-F</i>  | GGAGCTGCAACAGATTGAGCAACAG      | qRT-PCR |  |
| <i>SOC1-R</i>  | CGCTTTCATGAGATCCCCACTTTTC      | qRT-PCR |  |
| <i>At2S2-F</i> | ACCCCATGGGCCCAAGACAGA          | qRT-PCR |  |
| <i>At2S2-R</i> | GCTGGGGCCTTGTGGGTTTC           | qRT-PCR |  |
| <i>CRU1-F</i>  | CTCCTTTGCACGTTACATCATCGAG      | qRT-PCR |  |
| <i>CRU1-R</i>  | CGCATCCAGGGATCACTTTTCC         | qRT-PCR |  |
| <i>OLEO1-F</i> | CATCACAGTTGCACTCCTCATCACC      | qRT-PCR |  |
| <i>OLEO1-R</i> | TTGCACTGTCCAACCTTGCTGATCC      | qRT-PCR |  |
| <i>ATTI7-F</i> | GCCATCTTTTTTCATCCTCGTTTTGG     | qRT-PCR |  |
| <i>ATTI7-R</i> | CGGGAATATTCGAGGTGCACAGTAG      | qRT-PCR |  |
| <i>EIF4aF</i>  | AAACTCAATGAAGTACTTGAGGGAC      | qRT-PCR |  |
| <i>EIF4aR</i>  | TCTCAAACCATAAGCATAAATACCC      | qRT-PCR |  |

**Table S2**

[Click here to Download Table S2](#)

**Table S3**

[Click here to Download Table S3](#)

**Table S4**

[Click here to Download Table S4](#)

**Table S5**

[Click here to Download Table S5](#)
